# Supplementary material for: Pollen-Specific CRISPR/Cas9 System to Increase Heritable Gene Mutations in Maize
Source: MDPI journal article supplement (doi:10.3390/agriculture11080751), 2021-08-07
Supplement: s1 [file s1]

## Supporting materials

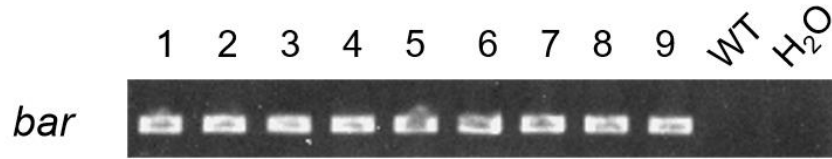

**Figure S1. Identification of T0 transgenic lines generated by the UC system and the PSC system.**

Gel images show PCR products amplified with bar-F/bar-R from T0 transgenic plants generated by the UC system (lanes 1, 2 and 3), the pZmPRO1 PSC system (lanes 4, 5 and 6) and the pZmPRO3 PSC system (lanes 7, 8 and 9). *bar*, Herbicide resistance *bar* gene. WT, H<sub>2</sub>O, negative control.

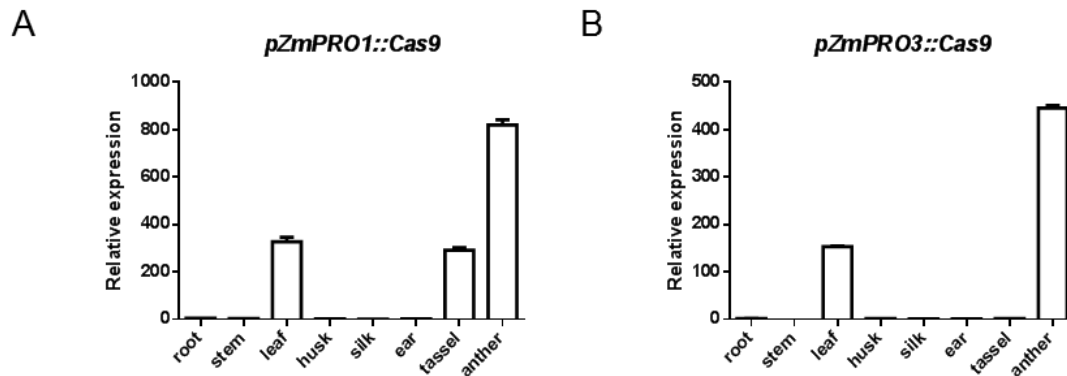

**Figure S2. Expression patterns of Cas9 in PSC system.**

A) and B) RNA expression levels of Cas9 in various tissues in T0 plants generated by the pZmPRO1 and pZmPRO3 PSC systems. For each RNA sample, three technical replicates were performed. Values are means with SE; n = 3 biological replicates.

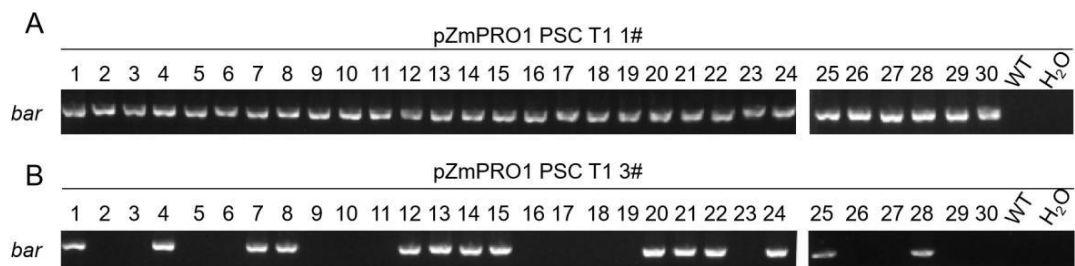

**Figure S3. Identification of T1 transgenic lines generated by the pZmPRO1 PSC system.**

Gel images show PCR products amplified with *bar*-F/*bar*-R from T1 plants generated by the ZmPRO1 system. *bar*, Herbicide resistance *bar* gene. WT, H<sub>2</sub>O, negative control.

A) *bar* identification of 30 T1 plants of #1 generated by the pZmPRO1 PSC system;

B) *bar* identification of 30 T1 plants of #3 generated by the pZmPRO1 PSC system.

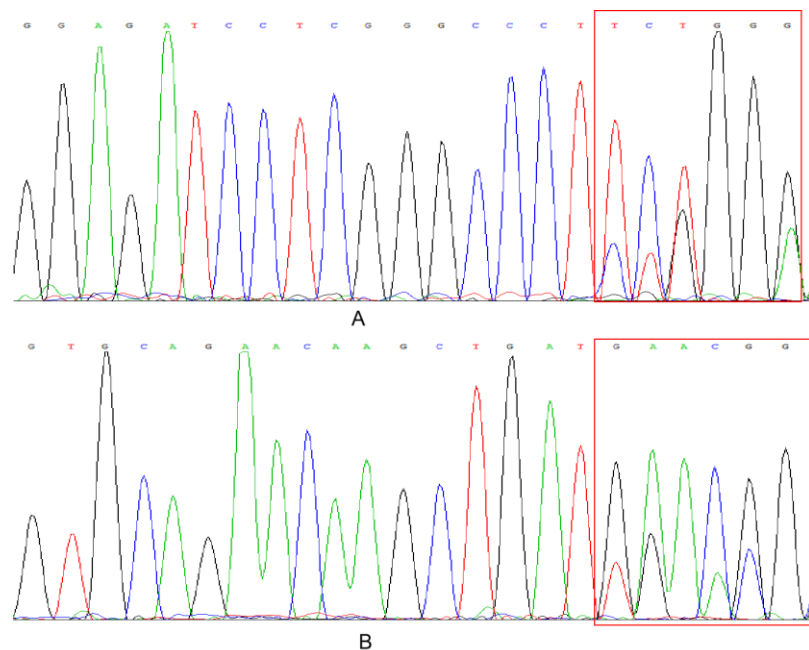

**Figure S4. The sequencing chromatographs of PCR products from the leaf of #1 T1 plants generated by the pZmPRO1 PSC system.**

A) Sequencing chromatograph of PCR product at target1. The 18<sup>th</sup> base "T" at target1 was deleted in only one chromosome that resulted in frame shift;

B) Sequencing chromatograph of PCR product at target4. The base "T" was inserted between the 17<sup>th</sup> and 18<sup>th</sup> bases at target4 in only one chromosome that resulted in frame shift.

**Table S1. Primers used in this study**

| Purpose                                                | Name                | Sequences (5'-3')                                |
|--------------------------------------------------------|---------------------|--------------------------------------------------|
| Quantitative<br>RT-PCR                                 | qZmPRO1-F           | ATTTGCTTGAGCGGCTCTTGTC                           |
|                                                        | qZmPRO1-R           | AGCTGAATATTCCCAGCGCAAC                           |
|                                                        | qZmPRO3-F           | CCAAGTACATGGTCATCCAAGGC                          |
|                                                        | qZmPRO1-R           | TTATGCCTCCAGATCCCTTCTTCC                         |
|                                                        | qCas9-F             | CCAGTCCAAGAACGGCTACG                             |
|                                                        | qCas9-R             | GATGGTCTCCTCGGACTTGC                             |
| Vector<br>Construction                                 | ZmPRO1-F            | AAGCTT CTATAGCGTGGGGTAAATGCG                     |
|                                                        | ZmPRO1-R            | GGTACC CTTCGCTCGGCGCGTTGGTC                      |
|                                                        | ZmPRO3-F            | GCACTTGTGTTGACACTCAATC                           |
|                                                        | ZmPRO1-R            | TGCTCAACTACGACCTGCAAT                            |
|                                                        | pU6-F               | AAGCTTCAGCAAATAATGGCATCCGA                       |
|                                                        | pU6-R               | GCGCGCGATGCGGTGCTTCCGGTTTG                       |
|                                                        | tU6-F               | GCGCGCAATTTTTTTGCGGATTGCG                        |
|                                                        | tU6-R               | AAGCTTGGGCTAAAGGAAAAAATGT                        |
|                                                        | pU6-F               | GGGATCCTCTAGAGTCGACCTGCAGCAAATA<br>ATGGCATCCGATG |
|                                                        | tU6-R               | CGCTGCAAAGCTTGCATGCCTGGGGCTAAA<br>GGAAAAAATGTTAG |
| Mutation<br>identification<br>for Sanger<br>sequencing | O2-F                | CTCCCCTTGCACTGCATCTC                             |
|                                                        | O2-R                | GGGTTCAAGATGCCTACCGA                             |
|                                                        | O2-F1-3             | AGCATCCAAGCGTACTCCTC                             |
|                                                        | O2-R1-3             | TTTCAGTTATTGCACCCCCA                             |
|                                                        | O2-F4               | ATATACCCATCCACAGGCGG                             |
|                                                        | O2-R4               | CCGTCCATGTCTTCGTCTGA                             |
| <i>bar</i><br>identification                           | bar-F               | GAAGTCCAGCTGCCAGAAAC                             |
|                                                        | bar-R               | GCACCATCGTCAACCACTAC                             |
| Targets<br>amplification<br>for Hi-TOM                 | O2-F <sub>1-2</sub> | GGAGTGAGTACGGTGTGCTATTGGGCATGG<br>AGCACGTC       |
|                                                        | O2-R <sub>1-2</sub> | GAGTTGGATGCTGGATGGCGGTGTGCTTGT<br>CGTCAG         |
|                                                        | O2-F <sub>3</sub>   | GGAGTGAGTACGGTGTGCTCAGGCGCCCTA<br>AATGTTGA       |
|                                                        | O2-R <sub>3</sub>   | GAGTTGGATGCTGGATGGCGCCGAAGATAT<br>AGCGAGGG       |

|                                |                   |                                                                         |
|--------------------------------|-------------------|-------------------------------------------------------------------------|
|                                | O2-F <sub>4</sub> | GGAGTGAGTACGGTGTGCCTGACTCTCGAT<br>CTGGCTCAC                             |
|                                | O2-R <sub>4</sub> | GAGTTGGATGCTGGATGGGGTAGGCATCTT<br>GAACCCCA                              |
| Barcoding<br>PCR for<br>Hi-TOM | F-1               | ACTCTTTCCCTACACGACGCTCTTCCGATCT<br>GCTTGCGTTGGAGTGAGTACGGTGTGC          |
|                                | F-2               | ACTCTTTCCCTACACGACGCTCTTCCGATCT<br>GCTTGTAGTGGAGTGAGTACGGTGTGC          |
|                                | F-3               | ACTCTTTCCCTACACGACGCTCTTCCGATCT<br>GCTTACGCTGGAGTGAGTACGGTGTGC          |
|                                | F-4               | ACTCTTTCCCTACACGACGCTCTTCCGATCT<br>GCTTCTCGTGGAGTGAGTACGGTGTGC          |
|                                | F-5               | ACTCTTTCCCTACACGACGCTCTTCCGATCT<br>GCTTGCTCTGGAGTGAGTACGGTGTGC          |
|                                | F-6               | ACTCTTTCCCTACACGACGCTCTTCCGATCT<br>GCTTAGTCTGGAGTGAGTACGGTGTGC          |
|                                | F-7               | ACTCTTTCCCTACACGACGCTCTTCCGATCT<br>GCTTCGACTGGAGTGAGTACGGTGTGC          |
|                                | F-8               | ACTCTTTCCCTACACGACGCTCTTCCGATCT<br>GCTTGATGTGGAGTGAGTACGGTGTGC          |
|                                | F-9               | ACTCTTTCCCTACACGACGCTCTTCCGATCT<br>GCTTATACTGGAGTGAGTACGGTGTGC          |
|                                | F-10              | ACTCTTTCCCTACACGACGCTCTTCCGATCT<br>GCTTCACATGGAGTGAGTACGGTGTGC          |
|                                | F-11              | ACTCTTTCCCTACACGACGCTCTTCCGATCT<br>GCTTGTGCTGGAGTGAGTACGGTGTGC          |
|                                | F-12              | ACTCTTTCCCTACACGACGCTCTTCCGATCT<br>GCTTACTATGGAGTGAGTACGGTGTGC          |
|                                | 2P-F              | AATGATACGGCGACCACCGAGATCTACACAC<br>CGACAAACACTCTTTCCCTACACGACGCTCT<br>T |
|                                | R-A               | GACTGGAGTTCAGACGTGTGCTCTTCCGATC<br>TCTGTGCGTTGAGTTGGATGCTGGATGG         |
|                                | R-B               | GACTGGAGTTCAGACGTGTGCTCTTCCGATC<br>TCTGTGTAGTGAGTTGGATGCTGGATGG         |
|                                | R-C               | GACTGGAGTTCAGACGTGTGCTCTTCCGATC<br>TCTGTACGCTGAGTTGGATGCTGGATGG         |

|     |                                                                  |
|-----|------------------------------------------------------------------|
| R-D | GACTGGAGTTCAGACGTGTGCTCTTCCGATC<br>TCTGTCTCGTGAGTTGGATGCTGGATGG  |
| R-E | GACTGGAGTTCAGACGTGTGCTCTTCCGATC<br>TCTGTGCTCTGAGTTGGATGCTGGATGG  |
| R-F | GACTGGAGTTCAGACGTGTGCTCTTCCGATC<br>TCTGTAGTCTGAGTTGGATGCTGGATGG  |
| R-G | GACTGGAGTTCAGACGTGTGCTCTTCCGATC<br>TCTGTGCGACTGAGTTGGATGCTGGATGG |
| R-H | GACTGGAGTTCAGACGTGTGCTCTTCCGATC<br>TCTGTGATGTGAGTTGGATGCTGGATGG  |

**Table S2. Targets in this study (Hi- II ).**

| Targets | Sequences (5'-3')       |
|---------|-------------------------|
| Target1 | GGAGATCCTCGGGCCCTTCTGGG |
| Target2 | GTGGACCTTTGAGAGGTTACTGG |
| Target3 | GGTAATGATGGCGCCTGCGGCGG |
| Target4 | GTGCAGAACAAGCTGATGAACGG |

**Table S3. Target gene mutations caused by the pZmPRO1 PSC system in the T1 generation.**

| Construct         | T1 lines | Target1                                                                           | Target2           | Target3 | Target4            |
|-------------------|----------|-----------------------------------------------------------------------------------|-------------------|---------|--------------------|
| pZmPRO1::C<br>as9 | #1-1     | D <sup>18</sup> T                                                                 | N                 | N       | N                  |
|                   | #1-2     | D <sup>18</sup> T                                                                 | N                 | N       | N                  |
|                   | #1-3     | <sup>17-18</sup><br>CCATTATTTATTATT<br>GATAAATAATAAGCC<br>CAGGAGACAGTCA<br>(43bp) | N                 | N       | N                  |
|                   | #1-4     | D <sup>18</sup> T                                                                 | N                 | N       | N                  |
|                   | #1-5     | N                                                                                 | N                 | N       | <sup>17-18</sup> T |
|                   | #1-6     | D <sup>18</sup> T                                                                 | N                 | N       | N                  |
|                   | #1-7     | D <sup>18</sup> T                                                                 | N                 | N       | <sup>17-18</sup> T |
|                   | #1-8     | D <sup>18</sup> T                                                                 | N                 | N       | N                  |
|                   | #1-9     | D <sup>18</sup> T                                                                 | N                 | N       | <sup>17-18</sup> T |
|                   | #1-10    | D <sup>18</sup> T                                                                 | N                 | N       | <sup>17-18</sup> T |
|                   | #1-12    | D <sup>18</sup> T                                                                 | N                 | N       | N                  |
|                   | #1-13    | D <sup>18</sup> T                                                                 | N                 | N       | N                  |
|                   | #1-14    | D <sup>18</sup> T                                                                 | N                 | N       | N                  |
|                   | #1-15    | N                                                                                 | N                 | N       | <sup>17-18</sup> T |
|                   | #1-16    | D <sup>18</sup> T                                                                 | N                 | N       | N                  |
|                   | #1-17    | D <sup>18</sup> T                                                                 | N                 | N       | <sup>17-18</sup> T |
|                   | #1-18    | D <sup>18</sup> T                                                                 | N                 | N       | N                  |
|                   | #1-19    | N                                                                                 | N                 | N       | <sup>17-18</sup> T |
|                   | #1-20    | D <sup>18</sup> T                                                                 | N                 | N       | N                  |
|                   | #1-21    | D <sup>18</sup> T                                                                 | N                 | N       | <sup>17-18</sup> T |
|                   | #1-22    | D <sup>18</sup> T                                                                 | N                 | N       | N                  |
|                   | #1-24    | D <sup>18</sup> T                                                                 | N                 | N       | N                  |
|                   | #1-25    | D <sup>18</sup> T                                                                 | N                 | N       | N                  |
|                   | #1-27    | D <sup>18</sup> T                                                                 | N                 | N       | N                  |
|                   | #1-28    | D <sup>18</sup> T                                                                 | N                 | N       | <sup>17-18</sup> T |
|                   | #1-29    | D <sup>18</sup> T                                                                 | N                 | N       | N                  |
|                   | #1-30    | D <sup>18</sup> T                                                                 | N                 | N       | N                  |
|                   | #3-13    | D <sup>16-20</sup>                                                                | D <sup>1-16</sup> | N       | N                  |
|                   | #3-15    | D <sup>18</sup> T                                                                 | N                 | N       | N                  |
|                   | #3-21    | D <sup>15-19</sup> CCTTC                                                          | N                 | N       | N                  |

|       |                   |   |   |   |
|-------|-------------------|---|---|---|
| #3-24 | D <sup>18</sup> T | N | N | N |
| #3-25 | D <sup>18</sup> T | N | N | N |
| #3-28 | D <sup>18</sup> T | N | N | N |

D and I refer to deletion and insertion, respectively; D<sup>x</sup>, I<sup>x</sup>, 'x' represents the position of the base; For example, D<sup>18</sup>T indicates the eighteenth base 'T' was deleted. N represents no mutation.

**Table S4. Target gene mutations caused by the UC system in the T1 generation.**

| Construct    | T1 lines | Target1               | Target2              | Target3                | Target4              |
|--------------|----------|-----------------------|----------------------|------------------------|----------------------|
| pZmUbi::Cas9 | #1-1     | D <sup>1-20</sup>     | D <sup>1-20</sup>    | N                      | I <sup>17-18</sup> T |
|              | #1-2     | I <sup>17-18</sup> T  | N                    | N                      | I <sup>17-18</sup> T |
|              | #1-3     | I <sup>17-18</sup> T  | N                    | N                      | I <sup>17-18</sup> T |
|              | #1-4     | I <sup>17-18</sup> T  | N                    | N                      | I <sup>17-18</sup> T |
|              | #1-5     | I <sup>17-18</sup> T  | N                    | N                      | I <sup>17-18</sup> T |
|              | #1-6     | I <sup>17-18</sup> T  | N                    | N                      | I <sup>17-18</sup> T |
|              | #1-7     | N                     | N                    | N                      | N                    |
|              | #1-8     | I <sup>17-18</sup> T  | N                    | N                      | I <sup>17-18</sup> T |
|              | #1-9     | I <sup>17-18</sup> T  | N                    | N                      | I <sup>17-18</sup> T |
|              | #1-10    | I <sup>17-18</sup> T  | N                    | N                      | I <sup>17-18</sup> T |
|              | #1-11    | I <sup>17-18</sup> T  | N                    | N                      | I <sup>17-18</sup> T |
|              | #1-12    | I <sup>17-18</sup> T  | N                    | N                      | I <sup>17-18</sup> T |
|              | #1-13    | I <sup>17-18</sup> T  | N                    | N                      | I <sup>17-18</sup> T |
|              | #1-14    | I <sup>17-18</sup> T  | N                    | N                      | I <sup>17-18</sup> T |
|              | #1-15    | I <sup>17-18</sup> T  | N                    | N                      | I <sup>17-18</sup> T |
|              | #2-1     | N                     | N                    | N                      | I <sup>17-18</sup> T |
|              | #2-2     | D <sup>18</sup> T     | N                    | N                      | I <sup>17-18</sup> T |
|              | #2-3     | D <sup>18</sup> T     | I <sup>17-18</sup> T | N                      | I <sup>17-18</sup> T |
|              | #2-4     | N                     | N                    | N                      | I <sup>17-18</sup> T |
|              | #2-5     | D <sup>18</sup> T     | N                    | N                      | I <sup>17-18</sup> T |
|              | #2-6     | N                     | N                    | N                      | I <sup>17-18</sup> T |
|              | #2-7     | D <sup>16-17</sup> CT | N                    | D <sup>16-18</sup> TGC | I <sup>17-18</sup> T |
|              | #2-8     | N                     | N                    | N                      | I <sup>17-18</sup> T |
|              | #2-9     | D <sup>15-16</sup> CC | N                    | N                      | I <sup>17-18</sup> T |
|              | #2-10    | N                     | N                    | N                      | I <sup>17-18</sup> T |
|              | #2-11    | N                     | N                    | N                      | I <sup>17-18</sup> T |

|       |                         |                    |                   |                    |
|-------|-------------------------|--------------------|-------------------|--------------------|
| #2-12 | N                       | N                  | N                 | <sup>17-18</sup> T |
| #2-13 | N                       | N                  | N                 | <sup>17-18</sup> T |
| #2-14 | <sup>17-18</sup> T      | N                  | N                 | <sup>17-18</sup> T |
| #2-15 | N                       | N                  | N                 | <sup>17-18</sup> T |
| #3-1  | D <sup>18</sup> T       | N                  | N                 | <sup>17-18</sup> T |
| #3-2  | D <sup>18</sup> T       | N                  | N                 | <sup>17-18</sup> T |
| #3-3  | N                       | N                  | N                 | N                  |
| #3-4  | D <sup>14-17</sup> CCCT | N                  | N                 | <sup>17-18</sup> T |
| #3-5  | D <sup>16</sup> C       | N                  | N                 | <sup>17-18</sup> T |
| #3-6  | D <sup>18</sup> T       | N                  | N                 | <sup>17-18</sup> T |
| #3-7  | N                       | N                  | N                 | N                  |
| #3-8  | D <sup>18</sup> T       | N                  | N                 | <sup>17-18</sup> T |
| #3-9  | N                       | N                  | N                 | <sup>17-18</sup> T |
| #3-10 | D <sup>18-20</sup> TTC  | <sup>17-18</sup> T | D <sup>1-20</sup> | <sup>17-18</sup> T |
| #3-11 | N                       | N                  | N                 | N                  |
| #3-12 | D <sup>1-20</sup>       | <sup>17-18</sup> T | N                 | <sup>17-18</sup> T |
| #3-13 | N                       | N                  | N                 | <sup>17-18</sup> T |
| #3-14 | D <sup>18</sup> T       | N                  | N                 | <sup>17-18</sup> T |
| #3-15 | D <sup>18</sup> T       | N                  | N                 | <sup>17-18</sup> T |

D and I refer to deletion and insertion, respectively; D<sup>x</sup>, I<sup>x</sup>, 'x' represents the position of the base; For example, D<sup>18</sup>T indicates the eighteenth base 'T' was deleted. N represents no mutation.

**Table S5. Target gene mutations caused by the pZmPRO1 PSC system in the T2 generation.**

| Construct         | T2 plants                                                     | Target1           | Target2 | Target3 | Target4 |
|-------------------|---------------------------------------------------------------|-------------------|---------|---------|---------|
| pZmPRO1::Cas<br>9 | #1-1-1                                                        | D <sup>18</sup> T | N       | N       | N       |
|                   | #1-1-2                                                        | D <sup>18</sup> T | N       | N       | N       |
|                   | #1-1-3                                                        | N                 | N       | N       | N       |
|                   | #1-2-1                                                        | N                 | N       | N       | N       |
|                   | #1-2-2                                                        | D <sup>18</sup> T | N       | N       | N       |
|                   | #1-2-3                                                        | D <sup>18</sup> T | N       | N       | N       |
|                   | #1-3-1                                                        | <sup>17-18</sup>  | N       | N       | N       |
|                   | CCATTATTTATTATTG<br>ATAAATAATAAGCCC<br>AGGAGACAGTCA<br>(43bp) |                   |         |         |         |



|         |                        |   |   |                      |
|---------|------------------------|---|---|----------------------|
| #1-3-2  | N                      | N | N | N                    |
| #1-3-3  | N                      | N | N | N                    |
| #1-4-1  | D <sup>18</sup> T      | N | N | N                    |
| #1-4-2  | N                      | N | N | N                    |
| #1-4-3  | N                      | N | N | N                    |
| #1-5-1  | N                      | N | N | N                    |
| #1-5-2  | N                      | N | N | N                    |
| #1-5-3  | N                      | N | N | I <sup>17-18</sup> T |
| #1-6-1  | N                      | N | N | N                    |
| #1-6-2  | D <sup>18</sup> T      | N | N | N                    |
| #1-6-2  | N                      | N | N | N                    |
| #1-7-1  | D <sup>18</sup> T      | N | N | I <sup>17-18</sup> T |
| #1-7-2  | N                      | N | N | N                    |
| #1-7-3  | N                      | N | N | N                    |
| #1-8-1  | D <sup>18</sup> T      | N | N | N                    |
| #1-8-2  | D <sup>18</sup> T      | N | N | N                    |
| #1-8-3  | N                      | N | N | N                    |
| #1-9-1  | D <sup>18</sup> T      | N | N | I <sup>17-18</sup> T |
| #1-9-2  | D <sup>18</sup> T      | N | N | I <sup>17-18</sup> T |
| #1-9-3  | N                      | N | N | N                    |
| #1-10-1 | N                      | N | N | N                    |
| #1-10-2 | D <sup>18-20</sup> TCT | N | N | I <sup>17-18</sup> T |
| #1-10-3 | N                      | N | N | N                    |
| #1-12-1 | D <sup>18</sup> T      | N | N | N                    |
| #1-12-2 | D <sup>18</sup> T      | N | N | N                    |
| #1-12-3 | N                      | N | N | N                    |
| #1-13-1 | D <sup>18</sup> T      | N | N | N                    |
| #1-13-2 | N                      | N | N | N                    |
| #1-13-3 | N                      | N | N | N                    |
| #1-14-1 | D <sup>18</sup> T      | N | N | N                    |
| #1-14-2 | D <sup>18</sup> T      | N | N | N                    |
| #1-14-3 | N                      | N | N | N                    |
| #1-15-1 | N                      | N | N | N                    |
| #1-15-2 | N                      | N | N | I <sup>17-18</sup> T |
| #1-15-3 | N                      | N | N | N                    |
| #1-16-1 | N                      | N | N | N                    |
| #1-16-2 | D <sup>18</sup> T      | N | N | N                    |

|         |                   |   |   |                      |
|---------|-------------------|---|---|----------------------|
| #1-16-3 | D <sup>18</sup> T | N | N | N                    |
| #1-17-1 | D <sup>18</sup> T | N | N | I <sup>17-18</sup> T |
| #1-17-2 | N                 | N | N | N                    |
| #1-17-3 | N                 | N | N | N                    |
| #1-18-1 | D <sup>18</sup> T | N | N | N                    |
| #1-18-2 | N                 | N | N | N                    |
| #1-18-3 | D <sup>18</sup> T | N | N | N                    |
| #1-19-1 | N                 | N | N | N                    |
| #1-19-2 | N                 | N | N | I <sup>17-18</sup> T |
| #1-19-3 | N                 | N | N | N                    |
| #1-20-1 | N                 | N | N | N                    |
| #1-20-2 | D <sup>18</sup> T | N | N | N                    |
| #1-20-3 | N                 | N | N | N                    |
| #1-21-1 | D <sup>18</sup> T | N | N | I <sup>17-18</sup> T |
| #1-21-2 | N                 | N | N | N                    |
| #1-21-3 | N                 | N | N | N                    |
| #1-22-1 | N                 | N | N | N                    |
| #1-22-2 | D <sup>18</sup> T | N | N | N                    |
| #1-22-3 | D <sup>18</sup> T | N | N | N                    |
| #1-24-1 | N                 | N | N | N                    |
| #1-24-2 | D <sup>18</sup> T | N | N | N                    |
| #1-24-3 | N                 | N | N | N                    |
| #1-25-1 | D <sup>18</sup> T | N | N | N                    |
| #1-25-2 | N                 | N | N | N                    |
| #1-25-3 | N                 | N | N | N                    |
| #1-27-1 | N                 | N | N | N                    |
| #1-27-2 | D <sup>18</sup> T | N | N | N                    |
| #1-27-3 | N                 | N | N | N                    |
| #1-28-1 | D <sup>18</sup> T | N | N | I <sup>17-18</sup> T |
| #1-28-2 | D <sup>18</sup> T | N | N | N                    |
| #1-28-3 | N                 | N | N | N                    |
| #1-29-1 | N                 | N | N | N                    |
| #1-29-2 | N                 | N | N | N                    |
| #1-29-3 | D <sup>18</sup> T | N | N | N                    |
| #1-30-1 | N                 | N | N | N                    |
| #1-30-2 | N                 | N | N | N                    |
| #1-30-3 | D <sup>18</sup> T | N | N | N                    |

|         |                    |                   |   |   |
|---------|--------------------|-------------------|---|---|
| #3-13-1 | N                  | N                 | N | N |
| #3-13-2 | D <sup>19-20</sup> | D <sup>1-18</sup> | N | N |
| #3-13-3 | N                  | N                 | N | N |
| #3-15-1 | D <sup>18</sup> T  | N                 | N | N |
| #3-15-2 | D <sup>18</sup> T  | N                 | N | N |
| #3-15-3 | N                  | N                 | N | N |
| #3-21-1 | D <sup>18</sup> T  | N                 | N | N |
| #3-21-2 | N                  | N                 | N | N |
| #3-21-3 | N                  | N                 | N | N |
| #3-24-1 | D <sup>18</sup> T  | N                 | N | N |
| #3-24-2 | D <sup>18</sup> T  | N                 | N | N |
| #3-24-3 | N                  | N                 | N | N |
| #3-25-1 | D <sup>18</sup> T  | N                 | N | N |
| #3-25-2 | N                  | N                 | N | N |
| #3-25-3 | N                  | N                 | N | N |
| #3-28-1 | D <sup>18</sup> T  | N                 | N | N |
| #3-28-2 | N                  | N                 | N | N |
| #3-28-3 | D <sup>18</sup> T  | N                 | N | N |

D and I refer to deletion and insertion, respectively; D<sup>x</sup>, I<sup>x</sup>, 'x' represents the position of the base; For example, D<sup>18</sup>T indicates the eighteenth base 'T' was deleted. N represents no mutation. New mutations were shown in red.
